# Supplementary material for: Ultrafast hot-carrier cooling in quasi freestanding bilayer graphene with hydrogen intercalated atoms
Source: Royal Society of Chemistry journal article supplement (doi:10.1039/d2na00678b), 2023-01-01
Supplement: d2na00678b1.pdf [file d2na00678b1.pdf]

## SUPPORTING INFORMATION

### Ultrafast Hot-Carrier cooling in Quasi Freestanding Bilayer Graphene with Hydrogen Intercalated Atoms

Sachin Sharma <sup>a</sup>, Rachael L. Myers-Ward <sup>b</sup>, Kurt D. Gaskill <sup>c</sup> and Ioannis Chatzakis, <sup>a†</sup>

#### Cooling via disorder assisted acoustic-phonon scattering

The cooling rate of electron through disorder assisted acoustic-phonon scattering (supercollisions)<sup>1,2,3</sup> is given by

$$\frac{\partial T_e}{\partial t} = \frac{1}{C} \frac{\partial \varepsilon}{\partial t} \quad (1)$$

Where  $C = \alpha T$  is the electron heat capacity and  $\alpha$  is the heat capacity coefficient. In the degenerate limit when  $k_B T \ll E_F$ , the electronic cooling rate assisted by supercollisions is given by

$$\frac{\partial T_e}{\partial t} = -\frac{A}{\alpha T} (T_e^3 - T_L^3) \quad (2)$$

Which is reduced to

$$\frac{\partial T}{\partial t} = -\frac{A}{\alpha} (T_e^2) \quad \text{For } T_e \gg T_L \quad (3)$$

The solution of the eq. 3 is:

$$T_e(t) = \frac{T_L}{1 + \frac{A}{\alpha} T_L t} \quad \text{for } T_e \gg T_L \quad (4)$$

That is the case based on the conditions of our experiment. The calculation of the cooling coefficient  $\frac{A}{\alpha}$  is based on the equation

$$\frac{A}{\alpha} = \frac{2 \lambda k_B}{3 k_F l \hbar} \quad (5)$$

where  $\lambda = \frac{2D^2 E_F}{\rho v_s^2 \pi (\hbar v_f)^2}$ ,  $k_F = \frac{E_F}{\hbar v_f}$  with Fermi energy  $E_F = 0.378 \text{ eV}$  of our sample,  $D$  is the deformation potential, and we chose the value of 15 eV adopted from literature [Pogna et. al., from the main text],  $\rho$  is the mass density of graphene  $7.6 \times 10^{-7} \text{ kg/m}^2$ ,  $v_F = 1.1 \times 10^6 \text{ m/s}$ , and  $v_s = 2.1 \times 10^4 \text{ m/s}$  is the Fermi velocity and the sound velocity, respectively.

$$\tau_{ms} = \frac{\mu E_F}{e v_F^2}$$

The  $l$  is the mean free path given by  $l = v_f \tau_{ms}$ . The calculation of the momentum scattering time  $\tau_{ms}$  is given by

where using Hall measurements we found the mobility,  $\mu = 4290 \text{ cm}^2 \text{ V}^{-1} \text{ s}^{-1}$ . Based on the above equations and quantities

we calculated the ratio  $\frac{A}{a}$  and found it as of  $\frac{A}{a} = 5.5 \times 10^7 \text{ K}^{-1} \text{ s}^{-1}$ . This value is compatible with the values in literature [22

in the main text]. The fit of the experimental data with the SC model fails dramatically as it can be seen in Figure S1. Finally, the cooling time due

$\tau_{sc}$  can be calculated

$$\tau_{sc} = \left( 3 \frac{A}{a} T_L \right)^{-1}$$

and which is more than 6

cooling time we

experimentally.

equation along with

inserting the average

measured which is

we used we find an

deformation

value of 100 eV.

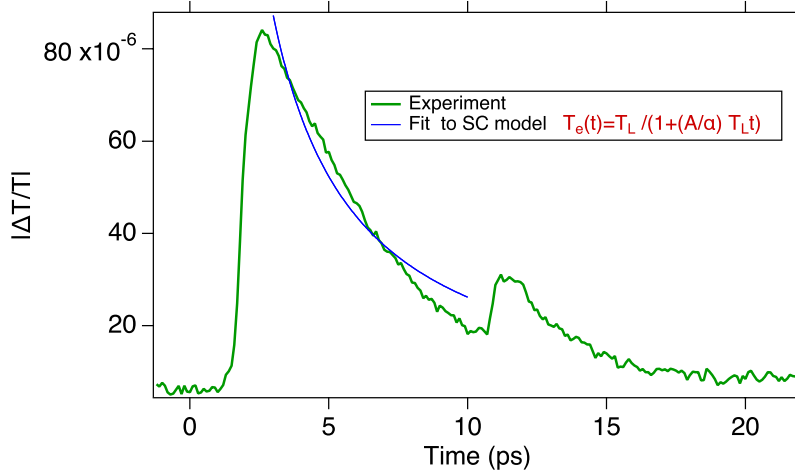

to supercollisions

from

we found  $\tau_{sc} = 20 \text{ ps}$

times larger than the

measured

Inverting the last

the eq.5 and by

cooling time we

4.2 ps of all fluences

unrealistically large

potential exciting the

**S1.** The green line is the experimental measure of THz waveform transmitted through the excited sample, that reflects the dynamics of the electron temperature. The blue line is an attempt to fit with the supercollision model (eq. 6) in the main text.

**Hall measurements:** The two sets of experimental parameters used to determine the mobility of the carriers are listed below:

B = 2060 G, Current: 5E-5 A, Resistivity: 1.59 Ohm-cm, Mobility: 4358 cm<sup>2</sup>/Vs, Sheet Carrier density: 9.03E12 cm<sup>-2</sup>, F-factor: 0.98,

B = 2060 G, Current: 10E-5 A, Resistivity: 1.60 Ohm-cm, Mobility: 4225 cm<sup>2</sup>/Vs, Sheet Carrier density: 9.25E12 cm<sup>-2</sup>, F-factor: 0.981

The average value of the mobility has been used in the calculations in the main text.

## References:

- [1] Mihnev, M. T. *et al.* Electronic cooling via interlayer Coulomb coupling in multilayer epitaxial graphene. *Nat Commun* **6**, 8105 (2015).
- [2] Graham, M. W., Shi, S.-F., Ralph, D. C., Park, J. & McEuen, P. L. Photocurrent measurements of supercollision cooling in graphene. *Nature Phys* **9**, 103–108 (2013).
- [3] Song, J. C. W., Reizer, M. Y. & Levitov, L. S. Disorder-Assisted Electron-Phonon Scattering and Cooling Pathways in Graphene. *Phys. Rev. Lett.* **109**, 106602 (2012).
- [55] El Fatimy, A. *et al.* Effect of defect-induced cooling on graphene hot-electron bolometers. *Carbon* **154**, 497–502 (2019).
